# Supplementary material for: Quantifying the resilience of rapid transit systems: A composite index using a demand-weighted complex network model
Source: PLoS One. 2022 Apr 28;17(4):e0267222. doi: 10.1371/journal.pone.0267222 (PMC9049543; doi:10.1371/journal.pone.0267222)
Supplement: S1 File — (ZIP) [file pone.0267222.s001.zip › Supporting Information.tex]

% Template for PLoS
% Version 3.5 March 2018
%
% % % % % % % % % % % % % % % % % % % % % %
%
% -- IMPORTANT NOTE
%
% This template contains comments intended 
% to minimize problems and delays during our production 
% process. Please follow the template instructions
% whenever possible.
%
% % % % % % % % % % % % % % % % % % % % % % % 
%
% Once your paper is accepted for publication, 
% PLEASE REMOVE ALL TRACKED CHANGES in this file 
% and leave only the final text of your manuscript. 
% PLOS recommends the use of latexdiff to track changes during review, as this will help to maintain a clean tex file.
% Visit https://www.ctan.org/pkg/latexdiff?lang=en for info or contact us at latex@plos.org.
%
%
% There are no restrictions on package use within the LaTeX files except that 
% no packages listed in the template may be deleted.
%
% Please do not include colors or graphics in the text.
%
% The manuscript LaTeX source should be contained within a single file (do not use \input, \externaldocument, or similar commands).
%
% % % % % % % % % % % % % % % % % % % % % % %
%
% -- FIGURES AND TABLES
%
% Please include tables/figure captions directly after the paragraph where they are first cited in the text.
%
% DO NOT INCLUDE GRAPHICS IN YOUR MANUSCRIPT
% - Figures should be uploaded separately from your manuscript file. 
% - Figures generated using LaTeX should be extracted and removed from the PDF before submission. 
% - Figures containing multiple panels/subfigures must be combined into one image file before submission.
% For figure citations, please use "Fig" instead of "Figure".
% See http://journals.plos.org/plosone/s/figures for PLOS figure guidelines.
%
% Tables should be cell-based and may not contain:
% - spacing/line breaks within cells to alter layout or alignment
% - do not nest tabular environments (no tabular environments within tabular environments)
% - no graphics or colored text (cell background color/shading OK)
% See http://journals.plos.org/plosone/s/tables for table guidelines.
%
% For tables that exceed the width of the text column, use the adjustwidth environment as illustrated in the example table in text below.
%
% % % % % % % % % % % % % % % % % % % % % % % %
%
% -- EQUATIONS, MATH SYMBOLS, SUBSCRIPTS, AND SUPERSCRIPTS
%
% IMPORTANT
% Below are a few tips to help format your equations and other special characters according to our specifications. For more tips to help reduce the possibility of formatting errors during conversion, please see our LaTeX guidelines at http://journals.plos.org/plosone/s/latex
%
% For inline equations, please be sure to include all portions of an equation in the math environment.  For example, x$^2$ is incorrect; this should be formatted as $x^2$ (or $\mathrm{x}^2$ if the romanized font is desired).
%
% Do not include text that is not math in the math environment. For example, CO2 should be written as CO\textsubscript{2} instead of CO$_2$.
%
% Please add line breaks to long display equations when possible in order to fit size of the column. 
%
% For inline equations, please do not include punctuation (commas, etc) within the math environment unless this is part of the equation.
%
% When adding superscript or subscripts outside of brackets/braces, please group using {}.  For example, change "[U(D,E,\gamma)]^2" to "{[U(D,E,\gamma)]}^2". 
%
% Do not use \cal for caligraphic font.  Instead, use \mathcal{}
%
% % % % % % % % % % % % % % % % % % % % % % % % 
%
% Please contact latex@plos.org with any questions.
%
% % % % % % % % % % % % % % % % % % % % % % % %

\documentclass[10pt,letterpaper]{article}
\usepackage[top=0.85in,left=2.75in,footskip=0.75in]{geometry}

% amsmath and amssymb packages, useful for mathematical formulas and symbols
\usepackage{amsmath,amssymb}

% Use adjustwidth environment to exceed column width (see example table in text)
\usepackage{changepage}

% Use Unicode characters when possible
\usepackage[utf8x]{inputenc}

% textcomp package and marvosym package for additional characters
\usepackage{textcomp,marvosym}

% cite package, to clean up citations in the main text. Do not remove.
\usepackage{cite}

% ulem package, for strikethroughs. Do not remove.
\usepackage{ulem}

% Use nameref to cite supporting information files (see Supporting Information section for more info)
\usepackage{nameref,hyperref}

% line numbers
\usepackage[right]{lineno}

% ligatures disabled
\usepackage{microtype}
\DisableLigatures[f]{encoding = *, family = * }

% color can be used to apply background shading to table cells only
\usepackage[table]{xcolor}

% array package and thick rules for tables
\usepackage{array}

% create "+" rule type for thick vertical lines
\newcolumntype{+}{!{\vrule width 2pt}}

% create \thickcline for thick horizontal lines of variable length
\newlength\savedwidth
\newcommand\thickcline[1]{%
  \noalign{\global\savedwidth\arrayrulewidth\global\arrayrulewidth 2pt}%
  \cline{#1}%
  \noalign{\vskip\arrayrulewidth}%
  \noalign{\global\arrayrulewidth\savedwidth}%
}

% \thickhline command for thick horizontal lines that span the table
\newcommand\thickhline{\noalign{\global\savedwidth\arrayrulewidth\global\arrayrulewidth 2pt}%
\hline
\noalign{\global\arrayrulewidth\savedwidth}}


% Remove comment for double spacing
%\usepackage{setspace} 
%\doublespacing

% Text layout
\raggedright
\setlength{\parindent}{0.5cm}
\textwidth 5.25in 
\textheight 8.75in

% Bold the 'Figure #' in the caption and separate it from the title/caption with a period
% Captions will be left justified
\usepackage[aboveskip=1pt,labelfont=bf,labelsep=period,justification=raggedright,singlelinecheck=off]{caption}
\renewcommand{\figurename}{Fig}

% Use the PLoS provided BiBTeX style
\bibliographystyle{plos2015}

% Remove brackets from numbering in List of References
\makeatletter
\renewcommand{\@biblabel}[1]{\quad#1.}
\makeatother

% Header and Footer with logo
\usepackage{lastpage,fancyhdr,graphicx}
\usepackage{epstopdf}
%\pagestyle{myheadings}
\pagestyle{fancy}
\fancyhf{}
%\setlength{\headheight}{27.023pt}
%\lhead{\includegraphics[width=2.0in]{PLOS-submission.eps}}
\rfoot{\thepage/\pageref{LastPage}}
\renewcommand{\headrulewidth}{0pt}
\renewcommand{\footrule}{\hrule height 2pt \vspace{2mm}}
\fancyheadoffset[L]{2.25in}
\fancyfootoffset[L]{2.25in}
\lfoot{\today}

%% Include all macros below

\newcommand{\lorem}{{\bf LOREM}}
\newcommand{\ipsum}{{\bf IPSUM}}

%% END MACROS SECTION

\begin{document}
\vspace*{0.2in}

\section*{Supporting information}

\paragraph*{S1 Appendix.}
\label{appendix:BC}
{\bf Average BC of a Linear Chain} 
\renewcommand{\thefigure}{S\arabic{figure}}

From Equation 9 of the main text, the BC of an edge $e$ is the proportion of shortest paths that pass through $e$, divided by the total number of shortest paths for all OD pairs. Since we are studying simple tree graphs with $N$ nodes and $N-1$ edges, there is only one unique shortest path for each OD pair and the equation can be simplified to counting the number of paths that pass through $e$.

This is illustrated in Fig \ref{fig:BC} (a), where an (undirected) tree graph with $N$ nodes is shown. In order to compute the BC for edge $e$, we note that any route that originates from a node on the left and ends on a node on the right would pass through $e$, \textit{independent of the network topology} on the left or right of edge $e$. This implies that the BC depends solely on the number of nodes to the left and right of the edge in question, and for our case, there are altogether $2x\,(N-x)$ number of paths that go through $e$. Therefore, the BC value for that edge is 
\begin{figure}[h]
%\centerline{\includegraphics[width=\textwidth]{Figures/BC_drawing.pdf}}
\caption{{\bf Betweenness centrality (BC) of a linear chain.} (a) BC of edge $e$ for a simple tree graph only depends on the number of nodes on the left and right of $e$. (b) Branches in the graph lower the average BC when compared to a linear chain of nodes.}
\label{fig:BC}
\end{figure}

\begin{equation}
BC(e) = BC(x,x+1) = \frac{2x\,(N-x)}{N(N-1)}.
\label{eq:bc_treegraph}  
\end{equation}

In order to find the maximum BC value, we take the derivative of Equation \ref{eq:bc_treegraph} with respect to $x$ and set it to zero, obtaining the intuitive result of $x=N/2$. In other words, the largest BC of an edge occurs when there are an equal number of nodes on the left and right of that edge. With this result, creating a tree graph with the largest average BC requires a network configuration where the number of nodes on the left and right of each subsequent edge to be as close to each other as possible, and this is only achieved in the linear chain. In Fig \ref{fig:BC} (b), the additional branch in the graph reduces the average BC of the network as the edge in that branch only has one node to the `left' of it when compared to the case if node $x$ is part of a linear chain connecting the $(x-1)^{\text{th}}$ and $(x+1)^{\text{th}}$ node. This can be generalised to an arbitrary number of branches with arbitrary number of nodes on each branch, where each additional branch lowers the average network BC. The network with the lowest average BC is then the network with the maximum number ($N-1$) of one-node branches, i.e. the star graph.

The average BC for the undirected linear chain $\overline{BC}_0$ can be calculated by summing up the BC values for each edge in the network given by Equation \ref{eq:bc_treegraph} and dividing by the total number of edges present:

\begin{equation}
\begin{aligned}
\overline{BC}_0 &= \frac{1}{N-1} \sum_{x=1}^{N-1} BC(x,x+1) \\ 
&= \frac{N+1}{3(N-1)},
\end{aligned}
\label{eq:bc_avelinear_undirected}
\end{equation}

\noindent where we have used summation identities to obtain the final result. For directed graphs, we simply multiply by a factor of $1/2$ to obtain the result given in Equation 11 of the main text.

\paragraph*{S2 Appendix.}
\label{appendix:corr_plot}
{\bf Pairwise Scatter Plots for the Resilience Indicators}

In Fig \ref{fig:corr_plot} , the off-diagonal entries are the pairwise scatter plots of the resilience indicators for each edge of the network, from which the Pearson product-moment correlation coefficients in Table 2 of the main text are computed; while the entries in the main-diagonal are the distributions of indicator values plotted as histograms. From the scatter plots, we observe that the indicators are generally not strongly correlated with one another, with the exception of PD and VPF in the 2016 network. When the structure of the network is modified in 2024, the correlation between PD and VPF is reduced.

\begin{figure}[h]
\caption{ {\bf Pairwise scatter plots for the indicators. (a) 2016 network. (b) 2024 network.}}
\label{fig:corr_plot}
\end{figure}


\nolinenumbers

\end{document}
